# Supplementary material for: Transient inhibition of NF-κB signaling enhances ex vivo propagation of human hematopoietic stem cells
Source: PubMed Central journal article supplement — Haematologica. 2018 Jun 7;103(9):1444–50. doi: 10.3324/haematol.2018.188466 (PMC6119158; doi:10.3324/haematol.2018.188466), 2018-09
Supplement: 2018.188466.TALKHONCHEH_SUPPL.pdf [file 2018.188466.TALKHONCHEH_SUPPL.pdf]

## Transient inhibition of NF- $\kappa$ B signaling enhances *ex vivo* propagation of human hematopoietic stem cells

Mehrnaz Safaee Talkhonchek, Agatheeswaran Subramaniam, Mattias Magnusson, Praveen Kumar, Jonas Larsson and Aurélie Baudet

Division of Molecular Medicine and Gene Therapy, Lund Stem Cell Center, Lund University, Sweden

©2018 Ferrata Storti Foundation. This is an open-access paper. doi:10.3324/haematol.2018.188466

Received: January 12, 2018.

Accepted: May 17, 2018.

Pre-published: June 7, 2018.

Correspondence: [jonas.larsson@med.lu.se](mailto:jonas.larsson@med.lu.se)

---

Supplemental figure 1

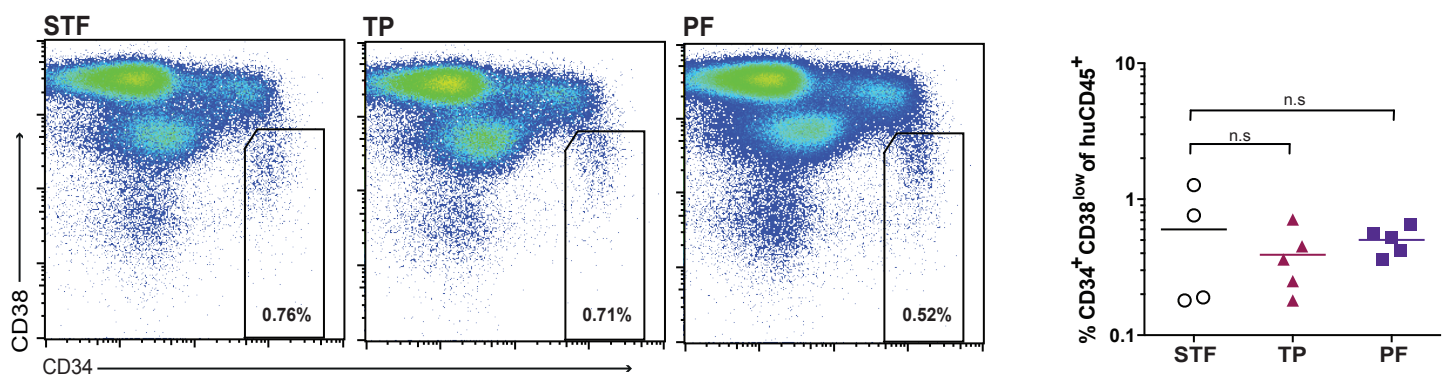

Supplemental figure 1. Level of HSC engraftment (CD34<sup>+</sup>CD38<sup>low</sup> cells) was measured 16 weeks post-transplantation in the bone marrow. Representative FACS plots gated from human CD45<sup>+</sup> cells and the accumulated data are shown. TP, TPCA1 and PF, PF184.

Supplemental figure 2

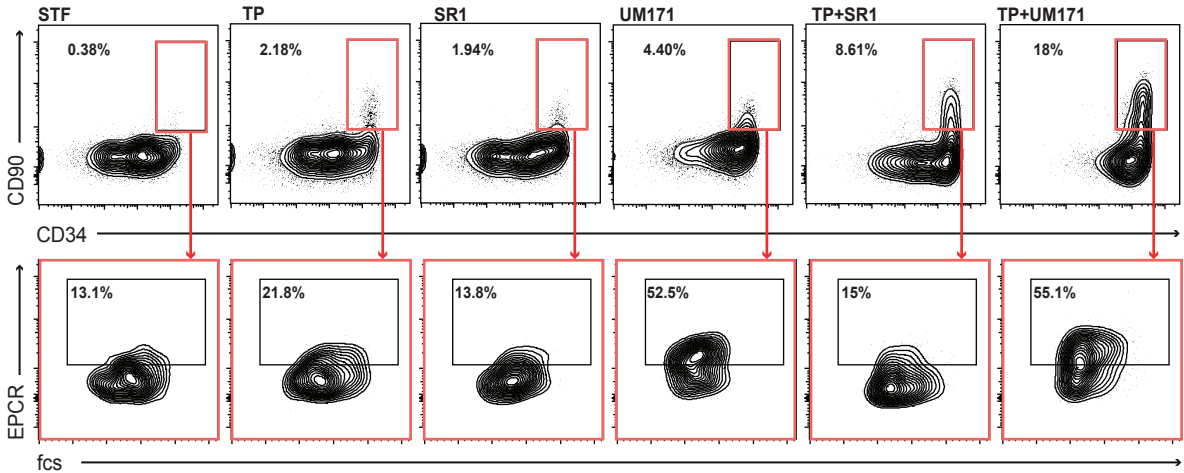

Supplemental figure 2. CD34<sup>+</sup> cells were treated with indicated compounds for 6 days and analyzed by flow cytometry for expression of CD34, CD90, and EPCR markers. TP,TPCA1

Supplemental figure 3

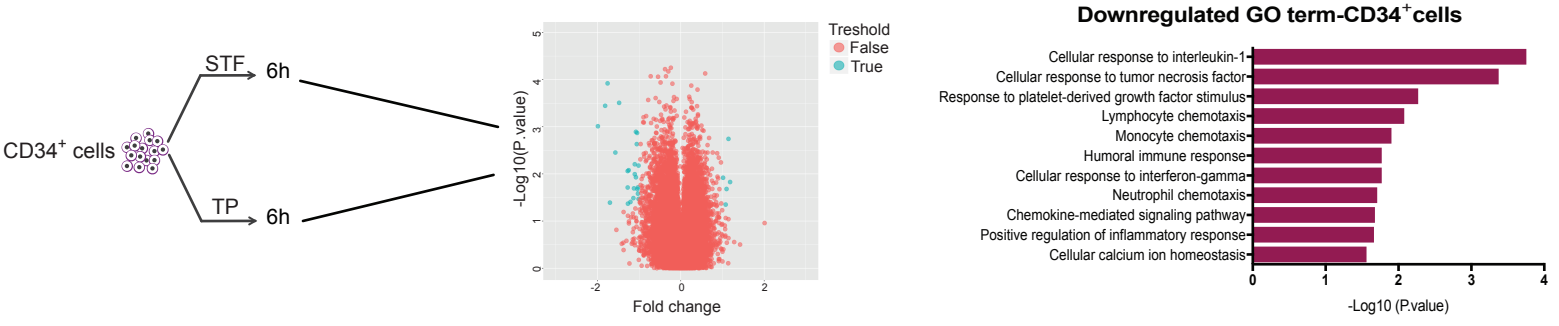

Supplemental figure 3. CD34<sup>+</sup> cells were treated with or without TP for 6 hours and subjected to transcriptome analysis by microarrays. Volcano plot and GO classification of two-fold modulated genes are shown for each condition.

## **Supplemental experimental procedure**

### **FACS antibodies**

Human engraftment was assessed by anti-human CD45 antibody (#304037) (BioLegend) and lineage distribution was evaluated with anti-CD33 (#55540, BD Biosciences), -CD15 (#301906, BioLegend), -CD3 (#4292971, eBioscience), and -CD19 (#562653, BD Biosciences) antibodies.

### **Microarray analysis**

CB-derived CD34<sup>+</sup>CD38<sup>-</sup>CD90<sup>+</sup>CD45RA<sup>-</sup> cells were transduced in triplicate with specified shRNA-expressing lentiviral vectors achieving around 60% transduction efficiency. Seven days after transduction, GFP<sup>+</sup>CD34<sup>+</sup> cells still expressing CD90 were sorted into RLT buffer and RNA was extracted with the RNeasy Micro kit following manufacturer's instructions (Qiagen), including a DNase incubation step. Microarrays (Affymetrix, U133 2.0) were hybridized and analyzed at the UCLA clinical microarray core (Los Angeles, USA). For the analysis of IKK $\beta$ -mediated transcriptional changes, CB-derived CD34<sup>+</sup> cells were treated with TPCA1 or STF in triplicate. After 6 hours, CD34<sup>+</sup> or sorted CD34<sup>+</sup>CD90<sup>+</sup> were lysed into RLT buffer. Subsequent sample processing and analysis on Affymetrix human genome U133+ array were performed at KFB (Regensburg, Germany). For both experiments, genes that showed a minimum of 2-fold modulation were considered for further analysis.

### **CFC assay**

After 7 days in culture, frequencies of colony-forming cells (CFC) were determined by plating 300 enriched CD34<sup>+</sup> cells in Methylcellulose (Methocult H4230, Stemcell technologies) supplemented with SCF (25 ng/mL), GM-CSF (50 ng/mL), IL-3 (25 ng/mL) (Peprotech) and EPO (5U/mL, Janssen). Plates were incubated at 37°C and

mature hematopoietic colonies were scored after 14 days.

### **Western blot**

Cells were collected and washed with PBS, lysed in Laemmli buffer, separated on NuPAGE™ 4–12% Bis-Tris gel (#17033171, Invitrogen), and transferred to nitrocellulose using iBlot device. After 1 hour at room temperature in blocking solution (ECL advance kit, GE Healthcare, #9720875), membranes were incubated overnight at 4°C with primary antibodies raised against IKKβ (D30C6, Cell Signaling, 1:2000), phosphorylated-IkBα (9246S, Cell Signaling, 1:2000) or total IkBα (4D4, Cell Signaling 1:2000), diluted in blocking solution. After several washes in PBS-1% Tween (Sigma), membranes were incubated with HRP-conjugated secondary antibody (anti-rabbit: 1/10,000, anti-mouse: 1/10,000). Equal loading was evaluated by establishing expression of actin (goat polyclonal IgG, Santa Cruz Biotechnology 1/500000). Luminescence signal was generated with ECL advance kit (GE Healthcare, #9740745), acquired using Chemidoc XRC apparel (Biorad), and images were processed with Image Capture software.

### **Cell cycle analysis**

CB CD34<sup>+</sup> cells were cultured with STF, TPCA1 or PF184 for 4 days and then analyzed for cell cycle status. Briefly, cells were stained for CD34 and CD90 markers prior to fixation with 0.4% paraformaldehyde (Sigma-Aldrich) in PBS (Invitrogen) for 30min. Next cells were incubated with Triton-X (0.2%, Sigma) for one hour at 4°C. Cells were washed and resuspended in PBS and stained with PE-Ki67 (BD Biosciences) for 2 hours at room temperature, and then DAPI (Invitrogen) was added for 30 minutes. Gated CD34<sup>+</sup>CD90<sup>+</sup> cells were analyzed for Ki67 expression and DAPI incorporation using FACS Canto II.

## Supplemental Table 1:

Supplemental table 1, related to figure 4: List of annotated genes (51) that were modulated in the CD34<sup>+</sup>CD90<sup>+</sup> population upon exposure to the IKKb inhibitor.

| coding/non coding | Gene          | FC    | P        | Corrected p Value | DAVID, Pubmed, ENSEMBL                          | Notes                                      |
|-------------------|---------------|-------|----------|-------------------|-------------------------------------------------|--------------------------------------------|
| C                 | CCL2          | -9,04 | 0,000059 | 0,284272          | inflammation                                    |                                            |
| C                 | CCL1          | -6,84 | 0,000762 | 0,360118          | immune function                                 | monocyte chemoattraction                   |
| C                 | IL1A          | -3,99 | 0,000236 | 0,301297          | inflammation                                    |                                            |
| C                 | CCL4L2        | -3,08 | 0,001057 | 0,390991          | inflammation                                    |                                            |
| C                 | EBI3          | -2,77 | 0,000087 | 0,284272          | inflammation                                    |                                            |
| C                 | CSF2          | -2,68 | 0,000477 | 0,311157          | immune function                                 | myeloid differentiation                    |
| C                 | IL2RA         | -2,66 | 0,000178 | 0,301297          | inflammation                                    |                                            |
| C                 | HAS2          | -2,65 | 0,000259 | 0,301297          | inflammation                                    |                                            |
| C                 | CCL3L3        | -2,64 | 0,001448 | 0,430378          | inflammation                                    |                                            |
| C                 | KYNU          | -2,51 | 0,000363 | 0,301297          | inflammation                                    | NAD co-factor synthesis                    |
| C                 | EBF1          | -2,41 | 0,001796 | 0,430378          | immune function                                 | Lymphocyte-specific gene expression        |
| C                 | RXFP1         | -2,35 | 0,039589 | 0,842789          | inflammation                                    | GTP-dependent signalling                   |
| C                 | FEZ1          | -2,31 | 0,000123 | 0,284272          | immune function                                 |                                            |
| C                 | BCL2A1        | -2,3  | 0,000003 | 0,151196          | Apoptosis                                       |                                            |
| C                 | LAMP3         | -2,21 | 0,001231 | 0,42146           | immune function                                 | DC differentiation                         |
| C                 | CCL4          | -2,2  | 0,002678 | 0,512495          | inflammation                                    |                                            |
| C                 | TNF           | -2,16 | 0,001694 | 0,430378          | inflammation                                    |                                            |
| C                 | RGS1          | -2,15 | 0,001013 | 0,389206          | inflammation                                    | GTP-dependent signalling                   |
| C                 | EDN1          | -2,11 | 0,002538 | 0,497748          | inflammation                                    |                                            |
| C                 | IL18RAP       | -2,07 | 0,003267 | 0,529023          | inflammation                                    |                                            |
| C                 | SAMHD1        | -2,06 | 0,000945 | 0,389206          | inflammation                                    |                                            |
| C                 | LAMC2         | -2,01 | 0,00045  | 0,311157          | immune function                                 | neutrophil chemo attraction                |
| C                 | GNRHR         | 2,08  | 0,032202 | 0,831791          | immune function                                 | Lymphocyte-specific gene expression        |
| NC                | RP11-212I21.2 | -2,99 | 0,00125  | 0,42146           | lincRNA                                         | MMP2 gene                                  |
| NC                | RNU7-133P     | -2,88 | 0,044941 | 0,854952          | snRNA                                           |                                            |
| NC                | RNU7-123P     | -2,3  | 0,004666 | 0,578925          | snRNA                                           | EFCAB7 gene                                |
| NC                | AC067945.4    | -2,25 | 0,041683 | 0,846426          | antisense                                       | STAT4 gene                                 |
| NC                | GBP1P1        | -2,19 | 0,006727 | 0,64184           | pseudogen to GBP1, a ginterferon-induced GTPase |                                            |
| NC                | MIR155HG      | -2,17 | 0,000359 | 0,301297          | lincRNA. miRNA                                  | undescribed locus                          |
| NC                | AP001615.9    | -2,16 | 0,049438 | 0,863853          | antisense                                       | RIPK4 gene                                 |
| NC                | RP11-388P9.2  | -2,12 | 0,003109 | 0,51866           | antisense                                       | ANK3 gene                                  |
| NC                | RP11-288L9.1  | -2,03 | 0,008705 | 0,661112          | lincRNA                                         | upstream of interferon-induced gene (IFI6) |
| NC                | SNORD113-1    | 2,02  | 0,030866 | 0,828577          | snoRNA                                          | MAPK/ERK and TGFb inhibition               |

|    |               |      |          |          |                  |                                |
|----|---------------|------|----------|----------|------------------|--------------------------------|
| NC | RNU4-9P       | 2,09 | 0,027845 | 0,822106 | snRNA-pseudogene | LATS2 gene                     |
| NC | RNU6-971P     | 2,1  | 0,011963 | 0,69766  | snRNA-pseudogene |                                |
| NC | SNORD1A       | 2,17 | 0,021198 | 0,785433 | snoRNA           |                                |
| NC | SNORD113-2    | 2,18 | 0,033563 | 0,835474 | snoRNA           |                                |
| NC | RP11-49O14.3  | 2,25 | 0,008305 | 0,659428 | sense intronic   | undescribed ORF(s)             |
| NC | MIR548L       | 2,26 | 0,02996  | 0,825677 | miRNA            |                                |
| NC | SNORD117      | 2,31 | 0,004317 | 0,561135 | snoRNA           | decreased in cancer (prostate) |
| NC | RNU6-1112P    | 2,34 | 0,012133 | 0,698686 | snRNA-pseudogene | N4BP2 gene                     |
| NC | SNORD114-31   | 2,37 | 0,040179 | 0,843064 | snoRNA           | promote cell growth (APL)      |
| NC | RNA5SP416     | 2,38 | 0,045237 | 0,85823  | rRNA             |                                |
| NC | RNU6-645P     | 2,4  | 0,002283 | 0,471259 | snRNA-pseudogene | JARID2 gene                    |
| NC | RNU6-1316P    | 2,41 | 0,026968 | 0,815395 | snRNA-pseudogene | TRAF3 gene                     |
| NC | RP11-862P13.1 | 2,51 | 0,029641 | 0,825677 | antisense        | GPHN gene                      |
| NC | RNU6-1318P    | 2,84 | 0,031442 | 0,83085  | snRNA-pseudogene | SLC35A3 gene                   |
| NC | RNU6-292P     | 2,97 | 0,026488 | 0,812484 | snRNA-pseudogene |                                |
| NC | SCARNA15      | 3,02 | 0,024683 | 0,80483  | Splicing         | Guide for RNU2                 |
| NC | RP11-90D4.3   | 3,44 | 0,010887 | 0,692446 | lincRNA          |                                |
| NC | RNU6-767P     | 3,53 | 0,005678 | 0,617247 | snRNA-pseudogene | MRIP gene                      |
