# Supplementary material for: Transient inhibition of NF-κB signaling enhances ex vivo propagation of human hematopoietic stem cells
Source: PubMed Central journal article supplement — Haematologica. 2018 Jun 7;103(9):1444–50. doi: 10.3324/haematol.2018.188466 (PMC6119158; doi:10.3324/haematol.2018.188466), 2018-09
Supplement: 2018_188466-Disclosures_and_Contributions.pdf [file 2018_188466-Disclosures_and_Contributions.pdf]

Haematologica  
HAEMATOL/2018/188466  
Version 3

Transient inhibition of NF- $\kappa$ B signaling enhances ex vivo propagation of  
human hematopoietic stem cells

Mehrnaz Safaee Talkhoncheh, Agatheeswaran Subramaniam, Mattias  
Magnusson, Praveen Kumar, Jonas Larsson, and Aurélie Baudet

Disclosures: none

Contributions: JL, AB, and MS designed, realized, and analyzed experiments with the help of PK. AS and MM performed microarray analysis. AS performed the cytokine beads array. All authors contributed to manuscript preparation.
